# Supplementary material
Source: PubMed Central journal article supplement (PMC6769140)
Supplement: rsbl20190461supp1.pdf [file rsbl20190461supp1.pdf]

Supplementary Material for

# Functional divergence of bitter taste receptors in a nectar-feeding bird

Yi Wang<sup>1,2</sup>, Hengwu Jiao<sup>1</sup>, Peihua Jiang<sup>2</sup>, and Huabin Zhao<sup>1,\*</sup>

<sup>1</sup>Department of Ecology, Hubei Key Laboratory of Cell Homeostasis, College of Life Sciences, Wuhan University, Wuhan 430072, China

<sup>2</sup>Monell Chemical Senses Center, Philadelphia, PA 19104, USA.

\*Email: huabinzhao@whu.edu.cn

**This file includes:**

Supplementary Methods

Tables S1-S4

Data Set S1

Figures S1-S4

## Supplementary Methods:

### Functional assays:

All of the *Tas2r* coding sequences for our functional assays were codon-optimized and synthesized. The coding sequences were inserted into the expression vector pCDNA3.1(+), with the first 45 amino acid residues of the rat somatostatin receptor 3 as the signal peptide at the 5'-end of the *Tas2r* receptors.

The bitter taste chemicals tested in our study included 13 natural and 11 synthetic compounds. Most of the naturally occurring compounds could be isolated from nectars, such as amygdalin, arbutin, caffeine, camphor, taurine and thiamine (Haydak et al. 1942; Lynn 2001; London-Shafir et al. 2003; Jerković and Kuš 2014; Nepi 2014); Some other bitter compounds were synthesized or distributed in plant tissues other than pollen, such as colchicine, salicin, picrotoxinin and yohimbine (Bader et al. 1954; Julkunen-Tiitto 1989; Finkelstein et al. 2010; Gössinger 2010). Additionally, chloramphenicol is a kind of bacteriostatic antibiotic isolated from soil bacterium (Fernandez-Martinez et al. 2014). Detailed information on the chemicals used in this study is presented in supplementary table S1. Our cell-based functional assays were carried out as previously described (Lei et al. 2015; Jiao et al. 2018). The concentrations of bitter compounds were followed according to a previous study (Meyerhof et al. 2010). Calcium mobilization was expressed as the percentage of fluorescence changes ( $\Delta F$ ) relative to the baseline (F);  $\Delta F$  was quantified as the peak fluorescence minus the baseline. All experiments were run in triplicate.

### Literature cited:

- Bader FE, Dickel DF, Schlittler E 1954. Rauwolfia Alkaloids. IX. 1 Isolation of Yohimbine from Rauwolfia serpentina Benth. *Journal of the American Chemical Society* 76:1695-1696.
- Fernandez-Martinez LT, Borsetto C, Gomez-Escribano JP, Bibb MJ, Al-Bassam MM, Chandra G, Bibb MJ 2014. New insights into chloramphenicol biosynthesis in *Streptomyces venezuelae* ATCC 10712. *Antimicrobial Agents and Chemotherapy* 58:7441-7450.
- Finkelstein Y, Aks SE, Hutson JR, Juurlink DN, Nguyen P, Dubnov-Raz G, Pollak U, Koren G, Bentur Y 2010. Colchicine poisoning: the dark side of an ancient drug. *Clin Toxicol (Phila)* 48:407-414.
- Gössinger E. 2010. Picrotoxanes. In: Fortschritte der Chemie organischer Naturstoffe/Progress in the Chemistry of Organic Natural Products: Springer. p. 71-210.
- Haydak MH, Palmer LS, Tanquary MC 1942. Vitamin content of honeys. *The Journal of Nutrition* 23:581-588.
- Jerković I, Kuš PM 2014. Terpenes in honey: Occurrence, origin and their role as chemical biomarkers. *RSC Advances* 4:31710-31728.
- Jiao H, Wang Y, Zhang L, Jiang P, Zhao H 2018. Lineage-specific duplication and adaptive evolution of bitter taste receptor genes in bats. *Mol Ecol* 27:4475-4488.
- Julkunen-Tiitto R 1989. Phenolic constituents of Salix: a chemotaxonomic survey of further Finnish species. *Phytochemistry* 28:2115-2125.
- Lei W, Ravoninjohary A, Li X, Margolskee RF, Reed DR, Beauchamp GK, Jiang P 2015. Functional Analyses of Bitter Taste Receptors in Domestic Cats (*Felis catus*). *PLoS One* 10:e0139670.
- London-Shafir I, Shafir S, Eisikowitch D 2003. Amygdalin in almond nectar and pollen—facts and possible roles. *Plant Systematics and Evolution* 238:87-95.
- Lynn LS 2001. The ecological significance of toxic nectar. *Oikos* 91:409-420.
- Meyerhof W, Batram C, Kuhn C, Brockhoff A, Chudoba E, Bufe B, Appendino G, Behrens M 2010. The molecular receptive ranges of human TAS2R bitter taste receptors. *Chem Senses* 35:157-170.
- Nepi M 2014. Beyond nectar sweetness: the hidden ecological role of non-protein amino acids in nectar. *Journal of Ecology* 102:108-115.

**Table S1. Information about 24 bitter compounds and the maximum concentrations used in our assays.**

| Compounds                    | Manufacturer | Catalog | (mM) | Source                                                                                                                 |
|------------------------------|--------------|---------|------|------------------------------------------------------------------------------------------------------------------------|
| Acesulfame K                 | Sigma        | 4054    | 10   | Synthetic                                                                                                              |
| Amygdalin                    | Sigma        | A6005   | 30   | Occurs naturally in almond nectar, distributed in Asia, Africa, Europe and America                                     |
| Arbutin                      | Sigma        | A4256   | 30   | Isolated from the nectar of <i>Arbutus unedo</i> (Ericaceae), which has a wide distribution                            |
| Caffeine                     | Sigma        | C0750   | 0.3  | Occurs naturally in nectar of <i>Coffea</i> and <i>Citrus</i> species, in Central and South America                    |
| Camphor                      | Sigma        | 148075  | 1    | Occurs naturally in floral components from <i>Achillea millefolium</i> .                                               |
| Chloramphenicol              | Sigma        | C0378   | 1    | Chloramphenicol is an antibiotic isolated from <i>Streptomyces venezuelae</i>                                          |
| Chloroquine diphosphate salt | Sigma        | C6628   | 10   | Synthetic                                                                                                              |
| Chlorpheniramine maleate     | Sigma        | C3025   | 0.1  | Synthetic                                                                                                              |
| Colchicine                   | Sigma        | C3915   | 3    | Extracted from two flowering plant: <i>Colchicum autumnale</i> and <i>Gloriosa superba</i>                             |
| Cycloheximide                | Sigma        | 1810    | 1    | Synthetic                                                                                                              |
| Denatonium benzoate          | Sigma        | D5765   | 10   | Synthetic                                                                                                              |
| Methimazole                  | Sigma        | M8506   | 5    | Synthetic                                                                                                              |
| 6-n-propylthiouracil         | Sigma        | P3755   | 1    | Synthetic                                                                                                              |
| Papaverine hydrochloride     | Sigma        | P3510   | 0.01 | Mainly naturally exists in the mature capsule shell of <i>Papaver somniferum</i>                                       |
| Phenanthroline               | Sigma        | 131377  | 1    | Synthetic                                                                                                              |
| Phenylthiocarbamide          | Sigma        | P7629   | 1    | Synthetic                                                                                                              |
| Picrotoxinin                 | Sigma        | P8390   | 1    | Isolated from <i>Menispermum cocculus</i> in India and Southeast;                                                      |
| Quinine                      | Sigma        | Q1125   | 0.01 | First isolated from the bark of <i>cinchona</i> tree, which are native to western South America.                       |
| Ranitidine hydrochloride     | Sigma        | R101    | 10   | Synthetic                                                                                                              |
| D-Salicin                    | Sigma        | S0625   | 3    | A glucoside for the whole genus of <i>Salix</i> , usually exists in flower bud and leaf bud                            |
| Sodium thiocyanate           | Sigma        | S7757   | 3    | Synthetic                                                                                                              |
| Taurine                      | Sigma        | T0625   | 1    | A kind of non-protein amino acid, which exists in animal tissues abundantly, and also found in some insects and nectar |

---

|           |       |       |      |                                                                                                                                                                |
|-----------|-------|-------|------|----------------------------------------------------------------------------------------------------------------------------------------------------------------|
| Thiamine  | Sigma | T4625 | 1    | Also called vitamin B1, naturally exists in nectar of many native American flowers                                                                             |
| Yohimbine | Sigma | Y3125 | 0.15 | An indole alkaloid mainly from African yohimbe tree, but is also found in some other plants, such as <i>Rauwolfia tetraphylla</i> , which is native to America |

---

**Table S2. Selective pressure analysis of *Tas2r1* genes in the Anna's hummingbird using the improved branch-site model.**

| Models                               | np  | <sup>a</sup> $\omega_0$ | <sup>a</sup> $\omega_1$ | <sup>a</sup> $\omega_2$ | $\ln L^b$ | $2\Delta(\ln L)^c$ | <i>P</i> -value <sup>d</sup> | Positively selected sites <sup>e</sup>                                                                 |
|--------------------------------------|-----|-------------------------|-------------------------|-------------------------|-----------|--------------------|------------------------------|--------------------------------------------------------------------------------------------------------|
| <b>Data set: <i>Tas2r1</i> genes</b> |     |                         |                         |                         |           |                    |                              |                                                                                                        |
| <b>Null Model</b>                    | 125 | 0.200 (50.5%)           | 1 (49.5%)               |                         | -21945.60 | 23.079             | 1.55E-06                     |                                                                                                        |
| <b>Alternative Model</b>             | 126 | 0.201 (46.9%)           | 1 (47.4%)               | 6.226 (5.7%)            | -21934.06 |                    |                              | <b>92I (0.979), 181L (0.912), 262S (0.819), 266S (0.983), 267L (0.906), 271K (0.845), 274M (0.923)</b> |

<sup>a</sup>The  $\omega$  values of each site class ( $\omega_0$ ,  $\omega_1$  and  $\omega_2$ ) are shown as percentages in parentheses.

<sup>b</sup>The natural logarithm of the likelihood value.

<sup>c</sup>Twice the difference in  $\ln L$  between the two models compared.

<sup>d</sup>*p* values were generated by comparing the two models with a chi-square test.

<sup>e</sup>Positively selected sites with the posterior probabilities  $>0.8$  were listed based on bayes empirical bayes (BEB) analysis. Sites in bold were also detected by site models (see the table S3 below)

**Table S3. Analysis of positively selected sites of the five hummingbird *Tas2r1* genes using site models.**

| Site models | np <sup>a</sup> | Ln <i>L</i> <sup>b</sup> | Model compared | <i>p</i> value <sup>c</sup> | Positively selected sites <sup>d</sup>                                                               |
|-------------|-----------------|--------------------------|----------------|-----------------------------|------------------------------------------------------------------------------------------------------|
| M1a         | 10              | -3410.822                | M1a vs M2a     | 3.40E-13                    | <b>91K (0.984), 92I (0.986), 94I (0.962), 96S (0.975), 154V (0.971),</b>                             |
| M2a         | 12              | -3382.112                |                |                             | <b>181L (0.993), 266S (1.000), 267L (0.961), 271K (0.985), 274M (0.989).</b>                         |
| M8a         | 11              | -3410.823                | M8a vs M8      | 6.84E-14                    | <b>91K (0.992), 92I (0.993), 94I (0.982), 96S (0.985), 154V (0.985),</b> 160I (0.967), 162I (0.971), |
| M8          | 12              | -3382.765                |                |                             | <b>181L (0.992), 187L (0.974), 266S (0.999), 267L (0.984), 271K (0.993), 274M (0.992)</b>            |

<sup>a</sup> Numbers of parameters.

<sup>b</sup> The natural logarithm of the likelihood value.

<sup>c</sup> P values were generated by comparing the two models with a chi-square test.

<sup>d</sup> Positively selected sites with the posterior probabilities >0.95 were listed based on bayes empirical bayes (BEB) analysis. Sites in bold were identified by both site models M2a and M8.



---

|           |   |   |   |   |   |   |   |   |   |
|-----------|---|---|---|---|---|---|---|---|---|
| Yohimbine | Y | n | n | n | Y | n | n | n | n |
|-----------|---|---|---|---|---|---|---|---|---|

---

Y = Has response, n = Has no response; CalAnn = Anna's hummingbird, ChaPel = chimney swift, CapCar = chuck-will's widow



**Data set S1. Tas2r gene sequences used in our cell-based functional assays.** We renamed their gene names and provided their previous names in Wang and Zhao 2015 GBE.

>*CalAnn\_Tas2r1a* (previously Anna's Hummingbird\_Tas2r1)

```
ATGGAAGCTTGCTCCTCTCAAGGGAAATTTAATGTCACCACGTACAATGCCGTGGCAAT
GGCCATCATCACCTCCAGACATTTGCTGGCATGTGGATAAATGCTTTCATTGTTTCTGT
GCTTTGTGTTTCTTGGGTGAAAAAGAGAAGCTTTAACACCAATGAGAAGATCTTGCTC
CTCCTGGGATGCTCCCGGGTTGGGTACTTGTGCACTGCATGGGTAGGTTCCCTTATTGA
AAATATTTACTCCTTTTTCGCGTGTATGTTACCAGAAAATCCAAATAATTTAGCTCTTCT
AAGCTTTTTCAACATTTTCAGCCTATGGATCTCTGCCATTCTTCTGTGTTTTACTGCATC
AAAATTGCAAATTTCCAGCACACCTTCTTCATCTACCTGAAAGTGAGAATTGACAGGAT
CGTGCCATGGCTGATGCTGACTTCAGTCCCTGTATCCCTGGGTGTCAGTGTCTTTGTCTA
CATTGTCATAGATGAAGCACGCTGTGACAACAACAATTGCACCACCTCAGGATATTTGT
GGCATCTGACTGTCAGACCTGAGCTACATTTTTTCCCTCTTATTTTTTCACTGGTTTTG
TATATGCAACTGCATTTGCAGCAGTAATCTCTTCTGCCCTTCTCCTGCTCTTTTCTCTCTG
GAGACACAAACACAGGATGCAGACAAAGTCAGGGAAGAACGTCAGTGTGGATGCCCA
TATCAAAGCCATGAAATCAATTCTCTCCTTTTTTCTTCATTGACACGATCCAGTTTATAATT
TTAATCCTTTCACTGATTTATCCCTGAAGAAGGAAAAGGCTGTGATGTTTTTTCATTACA
TTCTTTCTATATAGTTTTTTCAGCAGCTCATCCCTTATCCTTATATTCAGCAATCCCAAAC
TGAAAAGACACTGCTAAGAACCCTCTCCTGTCTGAAGTGCAAATTTGCATGAGGCA
TGAAACATAA
```

>*CalAnn\_Tas2r1b* (previously Anna's Hummingbird\_Tas2r6)

```
ATGGAAGCTTGCTCCTCTCAAGGGAAATTTAATGTCACCACGTACAATGCCATGTCAAT
GGCCATCATCACCTCCAGACATTTGCTGGCATGTGGATAAATGCTTTCATTGTTTCTGT
GCTTTGTGTTTCTTGGGTGAAAAAGAGAAGCTTTAACTCTAATGAGAAGATCTTGCTCT
TCTTGGGATGTGTCAGGTTTTGCTATTTTTGCATCACCTGGGTGTATTCCCTTTCTAAAAT
ACTGTATCAGTGTGCTTCTATGCTCACACCTAGCCCAGTTGTTTTTCAGCTATTCAAAG
TTTTTTCAGCTTTTTCAAATTTGTGGGTCTCTGCCTTTCTGTCTGTGTTTTACTGCATCAA
AATTGCAAATTTCCAGCACACCTTCTTCATCTACCTGAAAATGAGAATTGACAGGATCG
TGCCATGGCTAATGTTGGCTTCAGTCCCTGTATCTTGTGTCATCAGCTTCCCTCATCTATG
GGATTGCAGATGAAGCACTCAATAACAACCACAATTCCACTGCACCAGGAAATATCTG
GAAATTAATATCAAATGGATCGACGTTTTTTCCCTATTTTTTTCATCAGTGGCTTTGA
ATATGTGGCTGCATTTGCAGCAGTAATCTCTTCTGCCCTTCTCCTGCTCTTTTCTCTCTG
GAGACACAAACACAAGATGCAGGCAAAGTCAGGGAAGAACGTCAGTGTGGATGCCCA
TATCAAAGCCATGAAATCAATTCTCTCCTTCTTACTAATTTACAGCATCCATTTTATATGT
GCAATTATGGAAGTGAATTTATGCCACAAAGAAGGCAACGGCTGTGATGATAGTTATTTTC
ATTATTTAAGCATTCAATTTCCAAGTATTTATCCCTTATTTCTGATATTCAGCAACCCCAA
CTTGAAGAGACACTGATAAGGACCCTGTCTGCTGAAGTGCAAGATTTGCATGAAGT
AG
```

>*CalAnn\_Tas2r1c* (previously Anna's Hummingbird\_Tas2r3)

```
ATGGAAGCTTGACCTCTCAAGGGAAATTTAATGTCACCACGTACAATACTGTGTCAAT
GGCCATCGTCACCCTCCAGACATTTGCTGGCATGTGGATAAATGCTTTCATTGTTTCTGT
GCTTTGTGTTGCTGGGGGAAAAAGAGAAGCTTTAACTCTAATGAGAAGATCTTTCTAT
TCTGGGATGCTCCCGATTTTGTATTTGTTTCATCACCTGGGTATTTTTCTTTTTGAATA
TATTTACCCCTTTTGCATGGATGTTTACCCTGCAACTCAACTGCTTCAAGGAACTCAAA
ACTTTTTCAGTGTTCAGCTTATGGGTCTCTGCCATTCTTCTGTGTTTTACTGTGTCA
AAATTGCAAATTTCCAGCACAGCTTCTTCATCTACCTGAAGGTAAAAATTGACAGGTTT
GTGCCATGGCTGATGTTGGCTTCAGTCCCTATATCCCTGGGCAGTAGTACTTCTCCTAC
AAGGTCTGAGTGAATCGATCTGTAACAACACCAACTGCACTTCTGCAGAATATTTGTG
GAAAGACAGTAACAAAACACTCATGAAGATCTGCTTCTATTTTTGTTTTCTCAGTGGCATTG
TATATGCAACTGCATTCGAGCAGTAATCTCTTCTGCCCTTCTCCTGCTCTTTTCTCTCT
GGAGACACAAACACAGGATGCAGACAAAGTCAGGGAAGAACATCAGTATGGATGCC
ATATCAAAGCCATGAAATCGATTTTCTCCTTTTTCTTTGTTTACTGCATCAATTTTATATG
TTTGGTCTTGTCTTTGATTTATGAAACAAAGAGGGAAAGTACTATGCCAATTCTCATTTT
AGTACTACTGCTTGTCTTTCCAGCTGTTCATCCCTCATCTGATTTTTCAGCAATCCCAA
```

ACTGGAAAAGACACTGCTAAGGACCCTATCCTGTCTGAAGTGCAATATTTGCATGAAGT  
AG

>*CalAnn\_Tas2r1d* (previously Anna's Hummingbird\_Tas2r5)

ATGGAAGCTTGCACCTTTCAAGGGAAATTTAATGTCACCACGTACAATGCCGTGGCAAT  
GGCCATCATCACCTCCAGACATTTGCTGGCATGTGGATAAATGCTTTCATTGTTTCTGT  
GCTTTGTGTTGCCTGGGGGAAAAAGAGAAGCTTTAACTCTAATGAGAAGATCTTGCTC  
TTCCTGGGATGCTCCCGATCTTGCTATTTGTTCCACCACCTGGGTATTTTCTTTTTTGA  
AATATTTATCCTCTTTGCATGTATGTTTACTCCGTATACCTGTTCTTGTACCACCTCAAG  
ACTTTTTCAACGTTTCCAATGTGTGCGTTTCTGCCTTTCTTTCTGTGTTTTACTGTATCA  
AAATTGCAAATTTCCAGCACAGCTTCTTCATCTACCTGAAAGTGAGAATTGACAGGATG  
ATGCCATGGCTGATGTTGGCTTCAGTCCTTATATCCCTGGGCTATAGCATCTTTGTCTAC  
AAGATTGTTGATGAATCGATCTGTGACAATGTCAATTGCACCATGCTTGGACATATCTG  
GAAATATAGCATCAGAATTGATCAACTTTTTTCCATGTATGTTTTAATCACTGGATTTGTA  
TTTGCCATTGCATTCTCAGCAGTGAGCTTTTCTGTCCTTCTCCTCCTCTTTTCTCTCTGG  
AGACACAAACACAAGATGCAGACAGAATCAGGGAAGAACGTCAGTGTGGATGCCCAT  
ATCAAAGCCATGAAATCCATTCTGTCTTTTTTCTTCACTTACACCATCAACTTTGTATGT  
TTGGTCTTGACGCTGACTTATCCTATGAAGAACCAAAAGGCTGCAAAGTTTCTCATTTT  
TTTCTTTCAGCATTCTTTTCCAGCTGTTTCAATCCCTCATCTGATTTTTCAGCAATCCCA  
GCTTGA AAAAGACACTGCTCAGGACCCTGACGTGTATGAAGTGTAAGATTTGCAAGAGG  
TAG

>*CalAnn\_Tas2r1e* (previously Anna's Hummingbird\_Tas2r2)

ATGGAAGCTTGCACCTCTCAAGGGAAATTTAATGTCACCACGTACAATGCCGTGGCAA  
TGGCCATCATCACCTCCAGACATTTGCTGGCATGTGGATAAATGCTTTCATTGTTTCTG  
TGCTTTGTGTTTCTGGGTGAAAAAGAGAAGCTTTAACTAATGAGAAGATCTTGCT  
CCTTCTGGGATGCTCCCGTTTTTGGTATTCATGCATCACCTGGGTATTTACTTTTTCTTGA  
AAATATTTACCCCTTGTGCTTATATGTTTCTCCCACTCCAGACACTTTTTTGAATTC  
GAGCCTCTTCAACTTTTTCCAATTATGGGTCTCAGCCTTTCTTTTTGTGTTTTACTGCAT  
CAAATTTGCAAATTTCCGGAACACCTTCTTCATCTACCTGAAAGTGAGAATTGACAAG  
ATCGTGCCATGGCTGATGTTGGCTTCAGTCCTTTTGTCCCTGAGCTATGGCATCTATGTC  
TTTGAGGTGATGGATGAAGTCGTCTGTGAGAAAATCAACTGCACCACACCGGAAAT  
TCAGGAAGCAGAGGATGGGAATTAATGAATATATTTTACCCTTTTTTTTTCTCAGTGGCT  
TCTCATATGCGATTGCATTCATAGCAGTAATTTGTTCTGCCCTTCTCCTCCTTTTCTCTCT  
CTGGAACACAAATGCAAATGCAGACAAAGTCAGCGAAGAACGTCAGTGTGGATGC  
CCATATCAAAGCCGTGAAGTCAATTATCTCCTTTTTGTTAATTTACAGTATCAACTTTGTA  
TGTTAATCCTGTCACTGGTTTACAGGGTCAAGGAAGGATCTGGTGTGCCATATTTTATT  
TCACTACTTTCAGCATGCTTTTCCATCTGTTTCAATCCATTATCCTAGTTTTTCAGCAATCCCA  
AACTGGAAAAGATATTGCTAAGGACCCTGTCTGTGCAAAGTGCAAGATCTGCAAGAA  
TTAG

>*CalAnn\_Tas2r3* (previously Anna's Hummingbird\_Tas2r4)

ATGTTGCCACCAGTACTTATAATTTCAATAAGTATTGTAGCTGTTGAAGTTGTGGTTGGA  
GCTACTGGAAATGGATTTATCACAGCTGTTAATATCATTAACTGGATCAAAAAGCAAAAA  
AATTTCTTCCGCTGATGTGATCCTGATCTTTCTGACCACATCACGCTTTATCTTGCAAGT  
GACAATATTGATGCACATTCATAGTCTTTACTTTGTGGATGTGTTAAGTTGGCTTCTGT  
GTACAAAGCTTTTTGGTGCTATATGGATGTTTGTAACCATGCCAGTTTGTGGTTCAGTAC  
CTGGCTCTTTGTA CTACAGTGTA AAAATAATCAATGCTACCCAATGGCTGTTGCTGC  
AAATCAAGCTGAGAATAGCTGGGATGGTCCCATGGCTGCTTCTTGGATCCCTGGTGATC  
TCTTCTGTGACTTCTCTTCTTTACTGTGGATTGCACCCAGCACTTACCTCTGCAGCTCA  
ACGGGAACTGTAGAGAAAATAGCACAGCACATGCCACTGACTGGGACAGGTCACAT  
TTCTACCTGCTTCTTTTACATTGTAGGTTGTTTTTTTTCTTCTGGTATTTCTATGGTAA  
CCTCAGGTCTATTAATTACTTCTTTATGGAAACACACAAGGAAGATGCAATGTTATGTAG  
AGACTTTCAGGGATCCTTCAATAGATGTTACCTAACTGCAATTAATCCATTATTTCTT  
TCTTGGTCTTTTATCTTTCCAGTTTTATAGCTCAAATTTCTGCTGATACTGTCAACTTCTCA  
AAGTAAAGATGATGTCAAAGTTGCAGTATCCTTAGTTATAGTTGGGGCATATCCTTCCAT  
ACACTCTATTATCCTGATATTAGTCAATTCAAAACCTGAACTTGCATTCAGGTTGCTTTG

CCAGCATCTTAGGTGCCATTTGAAAATATGA

>*ChaPel\_Tas2r1a* (previously Chimney Swift\_Tas2r1)

ATGGAAGCTTGTTACTCTCAACACAAATATAATGTCACCACATACAATGTCTTGCCAATT  
TCCCTCCTGTCCCTGCAGACATTTGCTGGCATGTGGATAAACGCTTTCATGGTTTCTGT  
GCTTTGCATTGCTTGGGTCAGAAAGAAAAGCTCTAACTCCAATGAGAAGATCTTGGTC  
TTTCTGGGATGCACCCGGTTCTGGTACTTGTGCTTCATATGGGTGTCTCCCTTTATTACA  
ATTATTTATCCTTCATGCTTTTTTGTTCACCCCATGCCTCAATTACTTTTCAGCCATTGAAA  
CCTTTTTCAATTGTTGCAACCTGTGGGTTTCTGCCTTCCTTTCTGTTTTTTACTGTATCA  
AAATTGCAAATTTCCAGCACAGCTTCTTCATCTACCTGAAAGTGAAAATTGACAGGATC  
GTGCCATGGGTGCTCTTGGGTTCACTCCTTTTATCCCTGAGCTTCGGCATCCACATATAT  
GAAGTCATTGATGAAGCAGTCTGTGACAACATCAATTGTACCAGCAGAGGACATTTCT  
GGAAACAGAATATCAGACTTCATCAGCATTTTTTACCTTTTTATCTTTTCGCTGGATTCTG  
GATATGCCATTGCATTCACAGCAGTCATCACTTCTGCCCTTCTCCTCCTCTTTTCTCTCT  
GGAGACACAAACACAAGATGCAGATGAAGTCACTGAAGAACGTCAGCATGGATGCC  
ACATCAAAGCCATGAAATCTATTCTGTCTTTCTCTCCTGTACAGCATCAACTTTCTCT  
GTTTTGTCTTGGGAATTGCTTATATATCAAAGATGGAAAATGTTGTGACATCTGTCATTC  
CATTTCTAGAACAAGCTTTGCCAGGTGTTTCATTCTCTGATCCTGATTTTCAGCAATCCCA  
AACTGGAAAAGACACTGCTTAGGACCCTGCCCTGTGTGAAGTGCAAGATTTGCATGGG  
GCAGGAAATGTCATAA

>*ChaPel\_Tas2r1b* (previously Chimney Swift\_Tas2r3)

ATGGAAGCCTTGTTACTCTCAGGACAAGTATAATGCCACCACATACAATGTCTTGCCAAT  
TTCCCTCCTGTCCCTGCAGACATTTGCTGGCATGTGGATAAACGCTTTCATGGTTTCTGT  
GCTTTGCATTGCTTGGGTCAGAAAGAAAAGCTCTAACTCCAATGAGAAGATCTTGGTC  
TTTCTGGGATGCACCCGGTTTGGGGACTTGTGTATCACATGGGTGACTTCCTTTATTA  
AAACATTTATCCCATGTGTCTTCATGTAAAACCTTCTACCACAAATAGTTTCAGCTATTGT  
CAGCTTTTCAAACCTTCTCCAACCTGTGGGTTTCTGCCTTCCTTTCTGTTTTTTACTGTAT  
CAAATTTGCAAATTTCCAGCACAGCTTCTTCATCCACCTGAAAGTGAAAATTGACAGG  
ACCGTGCCATGGGTGCTCTTGGGTTCACTCCTTTTATCCCTGAGCTTCGGGATCCTCATC  
TCAAAGGTTGTTGATGAAGCAGTCTGTGACAACATCAACTGCACCACTACAGGAAATG  
TCTGGAAACTGAATATCAAACCTTTATCAGCATTTTTTACCTTTTTATTTTATCACTGGATT  
CGCATATGCCATTGCATTCACAACAGTCATCTCTTCTGCCCTTCTCCTCCTCTTTTCTCT  
GTGGAGACACAAACACAAGATGCAGATGAAGTCACTGAAGAATGTCAGCATGGATGC  
CCACATCAAAGCCATGAAATATATTCTGTCTTTCTCTCCTTTACAGCATCAGCTTTATC  
TGTTTGGTTTTATCAATGTCTTCTGACCCAGAGAAGGGAAACACTTTGGATTTTGTGAT  
TCCATTTTTTTCTTAGCTTTACCAGCAGTTCACTCTATGATCCTGATTTTCAGCAATCCC  
AAACTGAAAAAGACACTGCTGACCCTGTCTGTGTGAAGTGCAAGATTTGCATGAGG  
CAGGAAATGTCATAA

>*ChaPel\_Tas2r1c* (previously Chimney Swift\_Tas2r2)

ATGGAAGCTTGTTACTCTCAGGACAAGTATAATGTCACCACATACAATGTCTTGCCAAT  
TTCCCTCATCTCCCTGCAGACATTTGCTGGCATGTGGATAAACGCTTTCGTGTTTTCTGT  
GCTTTGCATTGCTTGGGTCAGAAAGAAAAGCTCTAACTCCAATGAGAAGATCTTGGTC  
TTTCTGGGATGCACCCGGTTCTGGTATTTGTGCTTCGCATGGGTCAGTTCCATTATCGAA  
AATATTTACCCTTGGTGCATTTATGTTTCGACCTGTACCCCAAGTAGTTTTAGCCTTTTCAG  
ACCTTCTTCAATTGTTCCAGCCTGTGGGTTTCTGCCTTCCGTTCTGTTTTTTACTGTACA  
AAAATTGCAAATTTCCAGCACAGCTTCTTCATCCACCTGAAAGTGAAAATTGACAGGA  
TCGTGCCATGGGTGCTCTTGGGTTCACTCCTTTTATCCTTGGGCATGGGGATCCTTCTCT  
ACAAAGTCATTGATGAAGCAGTCTGTGACAACATCAACTGCACCACTACAGGAAATGT  
CTGGAAACTGAATATCAATGTTTCATCAGCATTTTTCTCCCTGTTTATTTCTCCATGGCTT  
CGCATATGCCATTGCATTCACAGCAGTCATCTCTTCTGCCCTTCTCCTCCTCTTTTCTCT  
TGGAGACACAAACACAAGATGCAAATGAAGTCACTGAAGAACGTCAGCATGGATGCC  
CACATCAAAGCTATGAAATCTATTTTGTCTTTCTCTTCTGTACATAATTAACTTTATAG  
GCTTGGTTTTCAATCTGATTTATTTGACAAAGAAGGGAAATGCTTTGTGCTTCTCACT  
GTAGTATTACAGGATACTTCTCCAACCTGTTTATTGCCTCATCCTGATTTTCAGCAATCCC  
AAACTCAAAAAGGCACTGCTTAGGACCCTGTCTGTGTGAAGTGCAAGATTTGCATGA

GGCAGGAAATGTCATAA

>*ChaPel\_Tas2r3* (previously Chimney Swift\_Tas2r4)

ATGTTGCCACCAGTTCTTATAATTTCAATAACTATTGTAGCTATTGAAGTTGTTGTTGGA  
GTTCTTGGAACGGATTACATTACAGCTGTTAATATTACCAACTGGATCAAAGCAAACA  
AATTTCTTCTGCCAATGTGATCCTGATCTTTCTGAGCACATCAAGATTTATCTTGCAGGT  
GACCATACTGATGCACATCCATAGTCTCTACTTTGCAGATGTGTTCAAGCTGGCTTCTGT  
GTACAAAGCTTTTGGTGTATATGGATGTTTGTAAACCATGCCAGTTTGTGGTTCAGTAC  
CTGGCTCTTTGTGCTGTACTGTGTAAAATTAATCAATGTCACCCAATGGCTGTTGTTGCA  
AATCAAGCTCAGAATAGCTGGGATGGTCCCATGGCTGCTTCTAGGATCACTGGTGATGT  
CTTCTGTGACTTCTCTTCTTTACTGTGGATTGCACCCAGCACTTACCTCTGCAGCTCA  
ACAGGGAAGTGTAGAGAAAATAGTACAGCACATATCACTGACTGGCACAGTTCTCAAC  
TCTACCTGCTTCTTCTTTACATTATAGGTTGCTTTTTTCTCTGGTATTGTCTGTGGTAAC  
CTCAGCTCTGTTAATTACCTCTCTGTGGAAACACAGTAAGAAGATGCAATGTTATGTAG  
ATACTTTCAGGGATTCTTTGATAGATGTTACCTAACTGCAATTAATCCATTATTTCTTT  
CTTGATCCTATATCTTTCCAGTTTTATAGCTCAAATTCTGTTGATACTGTCGACTTCTCAA  
AGTAAAGATGATGTGAAAGTTGCAGTATCATTAGTTGTAGTTGGGGCATAACCTTCCAT  
ACACTCTATTATCCTGATATTAGTCAATTCAAAACCTGATATTGGCATTCAAGGATGTTTTGC  
CAGCATCTTAAGTGCCATTTGGAAAACAAGGCTCTATGCCTCCTGTTATAG

>*CapCar\_Tas2r1* (previously Chuck-will's widow\_Tas2r2)

ATGGAAGCTTGTTACTCTCAAGATGAATTTAATGTCTCCTCATACAAAGCAACGTTTATG  
GTCATCACCTCACTTCAAGCATTGCTGGCATGGGGATAAACGCTTTCGTTGTTTCTGT  
GCTTTGTATTGGTTTGGTCAAAAAGAAAACCTTTAACTCTAATGAGAAGATCTTGCTGT  
TTCTGGGATGTTCCAGGTTTTGGTTTTTGTGCATCACATGGGTATATTACTTCTTGCAAT  
AATTTATCCCCAGTGCTTTAATGTTCGCCCCATACCCAGCTCTTTCAGCTTTTCAAAA  
CTTTTTCAACTCTTCCAACCTTGTTGGTTTTCTGCCTGTCTTTGTATTTTCTATTGTATAAAA  
ATTGTAAATTTCAAGGTACATCTTCTTACCTGAAAGCAAAAATTGACAGGATCGT  
GCCATGGCTGTTGTTGGGTTCAAGTGCTTTTATCCCTGGTCATCAGCATCCTTGCCTACAA  
CTTCACTGATGAAACACACTATAACAATTCCACCAAATTTGGAAATTTCTGGAAACTGG  
ATCTCAGAACAGATCAACGTTATTTCCCTCTGGTTTTTATCAGCGGGTTTTGAATTTGCCA  
CTGCATTCTGACAGTAATCCTTTCTGCCCTTCCCCCTCTTTTCTCTCTGGAGACACA  
AATGCAAGATGCAAACAAACTCAGAGAAGACCCTCAGCATGGACGTTAACATCAAAG  
TCATTAATCTGTTCTGGCATTCTCATAATTTACACCATCAACTTTACATGTTGGTCTT  
GACACTGATTTATGCCACGAAGAATGAAAGCCTTCTGCTGTTTCTTATTTTATGATTTCA  
GTATGCTTTTCCAGCTCTTCAATCCCTTATTCTGATTTTCAAGCAACCCCAAACCTGGAAAA  
GACACTGCTAAAGACCCTGCACTATGTGAAGGGCAAAGTTTGCATGAGGTAG

>*CapCar\_Tas2r2* (previously Chuck-will's widow\_Tas2r1)

ATGCTGCAATATTTTCTCACATTTTTATGGCAGTGGCTGTAATTGAATCCATGGTAGGA  
CTTCTAGGAAATGGAACATCTTGGCTGTCAAGTTCAACTAGCTGCATCAGGAAGAAAAT  
ATTGCTTTCGTATGATATGATTATGATCTGTCTGAGTTTATCCAGATTCTTTTTGCAGTCC  
TGCAATATGCTGCATTTATTCCTAAGTATATTTTTCAAATCCTTGTATTATGAAATAAGAG  
TTCTTGTAATTTTCAACGCAGTTTTTATGTTTCTGAATTACACCAGCCTCTGGTTTGTGCTG  
CCTGGCTTAGCGTCTTCTATTGTACCAAGGTTGCTAGTTTTACTCAGTCTTTCTTCATCT  
GGCTGAAGCAAAGAATTTCCAGTCTCATGCCCTGGATACTGATAACATCAACTTTTTG  
TCCTTTGCAACCTCTTCTTCTTTTCGCTGGGATATCAACAACATGCACAACAACCTTAC  
TGCTCCTTTAACCGTGACAAACTCTTCAGAAAGGAGAGACACAATGAAAAACAGTTT  
GTTTGTAGTGATTCTTCTGTAAATGCCGGTATAGCTTTGCCTTTACTAGTGGTTGTTGTT  
TCAAGTATCCTACTAATTAGATCTCTGTGGATACACACCCGACAGATGCAAAAATAATGC  
AACTGGCTTCAAGGATCCCAGCGTAGAGGCCATGTTGCTGCCATCAAGTCAGTCATTT  
CCTTCTTATCCTCTGCGTTACATATTTCAATGCTTGGTTCTCATTTTAAAGCAGAATTTT  
TTTGCCTTTAAGCACTGAGGTAGCCATATGTATAGCTGTAATGGCAGCCTGCTTGCAG  
GACACTCTATGATCTTAATCTGGAGCAACCCCAAATTTTCGAGCTAGGATTTTGCCTAC  
ACAAACTGTCATGTAAGAAGTACTAGATCCATGTAA

>CapCar\_Tas2r3 (previously Chuck-will's widow\_Tas2r3)

ATGTTGCCACCAGTTCTTATAATTTCAATAAGTATTGTAGCTATTGAAGTTGTTGTTGGA  
GTTATTGGAAATGGATTTATTACAGCTGTTAATATCATTAACTGGATCAAAAGCAAAAAA  
GTTTCTTCTGCTGATATGATCCTGATCTTTCTGAGCACATCAAGGTTTATCTTGCAGGTT  
ACCGTACTGATGCACATTCATAGTCTCTACTTTACAGATGTGCTTAAGTTGGCTTCCGTG  
TACAAAGCTTTTGGTGCTGTATGGATGTTTGTAAACCATGCCAGTTTGTGGTTCAGTAC  
CTGGCTCTATGTACTGTACTGTGTAATAATAATCAACATCACCCAATGGCTGCTGCTGC  
AACTCAAGCTCAGGATAGCTCGGATGGTCCCATGGCTGCTTCTAGGATCACTGGTGATC  
TCTTCTGCGACTTCTCTTCCTTTCCCTATGGATTACACCCAGCACTTACCTCTGCAGCTCA  
ACGGGGAAGTGCAGAGAAAATAGCACAGCACATATCACTGACTGGGACAGTTCGCATC  
TCTACCTGCTACTTCTTTACTTTGTAGGTTGTTTTTTTTCTCTAATATTATCTGTGATAACC  
TCAGCTCTATTAATTACTTCTCTATGGAAACACACAAAGAAAATGCAATGTTATGCAGAT  
ACTTTCAGGGATCCTTTAGTAGATGTTACCTAACTGCCATTAATCCATTATTTCTTTCT  
TGATCCTATACCTCTCCAGTTTTGTAGCTCAAATTCTGTTGATAATGTCGACCTCTCAA  
GTAAAGACGATGTGAAAGTTGCAGTATCCTTAGTTGTATCTGGGGCATATCCTTCTATAC  
ACTCTATTATCCTGATCATAGTCAATTCAAAACCTGAAATTGGCATTTCAGGTTGCTTTGTC  
AGCATCTTAAGCACCATTTGGAAAATATGACTCTGTGTCTTATAGCTTAA

## Supplementary figure captions

**Figure S1. Positive selected sites in hummingbird *Tas2r1* genes.** (a) Alignment of the amino acid sequences of five hummingbird *Tas2r1*s. Positively selected sites identified by both site models were indicated with red asterisks; positively selected sites detected by both site models and the branch-site model were shown in blue. (b) Snake plot of hummingbird *Tas2r1*s based on the alignment of the amino acid of five hummingbird *Tas2r1* receptors. The positively selected sites identified by site models were indicated with an open circle and an amino acid position, while the sites detected by both site models and the branch-site model were indicated by blue circles with amino acid positions. The seven membrane domains were predicted using the TMHMM methods.

**Figure S2. Responses of avian *Tas2r1* receptors to bitter compounds.** HEK293 cells transfected with one bird *Tas2r1* construct along with  $G\alpha 16$ -gust44 were assayed for their responses to 24 bitter compounds. Black traces, calcium mobilization of the nine *Tas2r1* receptors to bitter compounds; grey traces, mock-transfected cells.

**Figure S3. Quantitative analysis of responses of bird *Tas2r1* receptors to bitter compounds.** Responses of HEK293 cells transiently transfected with one bird *Tas2r1* receptor and  $G\alpha 16$ -gust44 to bitter compounds were quantified by the expression of bar graph. Black bar, responsiveness of *Tas2r*-transfected cells; grey bar: mock-transfected cells. Data are expressed as mean  $\pm SE$  percent change in fluorescence ( $\Delta F$ , peak fluorescence-baseline fluorescence) compared with baseline fluorescence ( $F$ ) from three independent wells. Two-tailed Student's t-test were performed to confirm whether responses from *Tas2r*-transfected cells were significantly different from that of mock-transfected cells ( $p < 0.05$ ). All the bitter compound-elicited responses were significantly higher than mock-transfected cell baseline, with the exception of CalAnn\_*Tas2r1c* toward camphor (c).

**Figure S4. Functional responses of bird *Tas2r2* and *Tas2r3* receptors.** *Tas2r* constructs were expressed along with  $G\alpha 16$ -gust44 in HEK293 cells to examine their responses to two bitter compounds. Black bar, responsiveness of *Tas2r*-transfected cells; grey bar: mock-transfected cells. (a, c) Quantitative analysis of responses of bird *Tas2rs* to denatonium benzoate (10 mM) and yohimbine (0.15 mM). (b, d) Dose-dependent responses of bird *Tas2r* receptors to denatonium benzoate and yohimbine. GraphPad Prism 7 was used to fit the curves.

**a**

|                | <u>TM1</u> |            |            |            | <u>TM2</u> |            |               |            | <b>** * *</b> |            | 100 |
|----------------|------------|------------|------------|------------|------------|------------|---------------|------------|---------------|------------|-----|
| CalAnn_Tas2r1a | MEACSSQGKF | NVTTYNAVAM | AIITLQTFAG | MWINAFIVSV | LCVSWVKKRS | FNTNEKILLL | LGCSRVGILC    | TAWVGSFIEN | IYSFCVYVHQ    | KIQIISALLS |     |
| CalAnn_Tas2r1b | MEACSSQGKF | NVTTYNAMSM | AIITLQTFAG | MWINAFIVSV | LCVSWVKKRS | FNSNEKILLF | LGCVRFYFC     | ITWVYSFLKI | LYQCRFYAHH    | LAQLFSAIQS |     |
| CalAnn_Tas2r1c | MEACTSQGKF | NVTTYNTVSM | AIVTLQTFAG | MWINAFIVSV | LCVAWGKKRS | FNSNEKIFLF | LGCSRFCYLF    | ITWVFFLFY  | IYPCMDVYP     | ATQLLQGTQN |     |
| CalAnn_Tas2r1d | MEACTFQGKF | NVTTYNAVAM | AIITLQTFAG | MWINAFIVSV | LCVAWGKKRS | FNSNEKILLF | LGCSRSCYLF    | ITWVFSFFEN | IYPLCMYVYS    | VYLFVLPLQD |     |
| CalAnn_Tas2r1e | MEACTSQGKF | NVTTYNAVAM | AIITLQTFAG | MWINAFIVSV | LCVSWVKKRS | FNTNEKILLL | LGCSRFWYSC    | ITWVFTFLEN | IYPLCLYVSP    | TLQTLFGIQS |     |
|                | <u>TM3</u> |            |            | <u>TM4</u> |            |            | <b>*</b>      |            |               |            | 200 |
|                | FFNIFSLWIS | AILSVFYCIK | IANFQHTFFI | YLKVRIDRIV | PWLMLTSVPV | SLGVSVFVYI | VIDEARCDNN    | NCTTSGYLWH | LTVRPELHFF    | PLYFFTGFVY |     |
|                | FFSFSNLWVS | AFLSVFYCIK | IANFQHTFFI | YLKMRIDRIV | PWLMLASVLV | SLVISFLIYG | IADALNNNH     | NSTAPGNIWK | LNKMDRRFF     | PIFFISGFY  |     |
|                | FFSVSSLWVS | AILSVFYCVK | IANFQHSFFI | YLKVKIDRFV | PWLMLASVLI | SLGSSSFSYK | VLSEICNNT     | NCTSAEYLWK | DSNKTHEDLL    | LFLELFGIVY |     |
|                | FFNVSNCVVS | AFLSVFYCIK | IANFQHSFFI | YLKVRIDRMM | PWLMLASVLI | SLGYSIFVYK | IVDESICDNV    | NCTMLGHIWK | YSIRIDQLFS    | MYVLITGFVF |     |
|                | LFNFSNLWVS | AFLVFVYCIK | IANFRNTFFI | YLKVRIDKIV | PWLMLASVLL | SLSYGIYVFE | VMDEVVCEKI    | NCTTPGNFRK | QRMGINEYIF    | TLFFLSGFSY |     |
|                | <u>TM5</u> |            |            | <u>TM6</u> |            |            | <b>** * *</b> |            | <u>TM7</u>    |            | 300 |
|                | ATAFAAVISS | ALLLFLSLWR | HKHRMQTKSG | KNVSVDAHIK | AMKSILSFFF | IDTIQFIILI | LSLIYSLKKE    | KAVMFFITFF | LYSFSAAHSL    | ILIFSNPKLE |     |
|                | VAFAAVISS  | ALLLFLSLWR | HKHKMQAKSG | KNVSVDAHIK | AMKSILSFL  | IYSIHFCAI  | MELIYATKKA    | TAVMIVISLF | KHSFPSIYSL    | ILIFSNPKLE |     |
|                | ATAFAAVISS | ALLLFLSLWR | HKHRMQTKSG | KNISMDAHIK | AMKSIFSFFF | VYCINFICLV | LSLIYETKRE    | STMPILILVL | LLAFPAVHSL    | ILIFSNPKLE |     |
|                | AIAFSAVSFS | VLLLFLSLWR | HKHKMQTESG | KNVSVDAHIK | AMKSILSFFF | TYTINFVCLV | LTLTYPMKNQ    | KAAKFLIFF  | QHSFPAVHSL    | ILIFSNPKLE |     |
|                | AIAFIAVICS | ALLLFLSLWK | HKCKMQTKSA | KNVSVDAHIK | AVKSIISFLL | IYSINFVCLI | LSLVYRVKEG    | SGVPYFISLL | QHAFPSVHSI    | ILVFSNPKLE |     |
|                |            |            |            | 320        |            |            |               |            |               |            |     |
|                | KTLRLTSLCL | KCKICMRHET |            |            |            |            |               |            |               |            |     |
|                | ETLRLTSLCL | KCKICMK--- |            |            |            |            |               |            |               |            |     |
|                | KTLRLTSLCL | KCNICMK--- |            |            |            |            |               |            |               |            |     |
|                | KTLRLTSLCL | KCKICKR--- |            |            |            |            |               |            |               |            |     |
|                | KILLRLTSCA | KCKICKN--- |            |            |            |            |               |            |               |            |     |

**b**

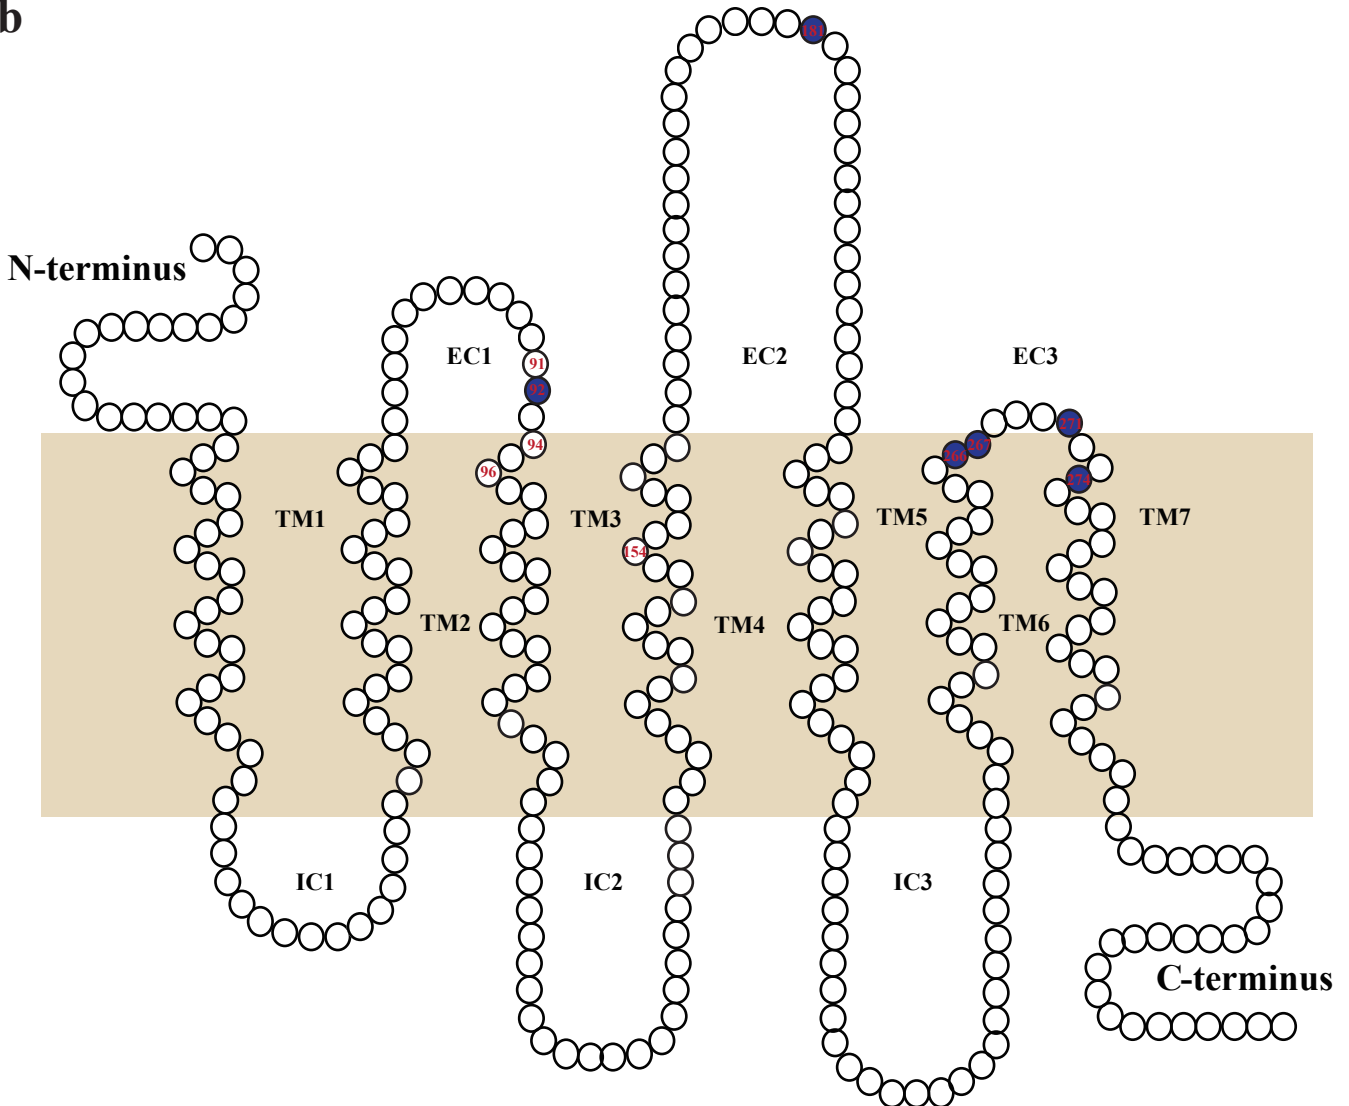

**Figure S1**

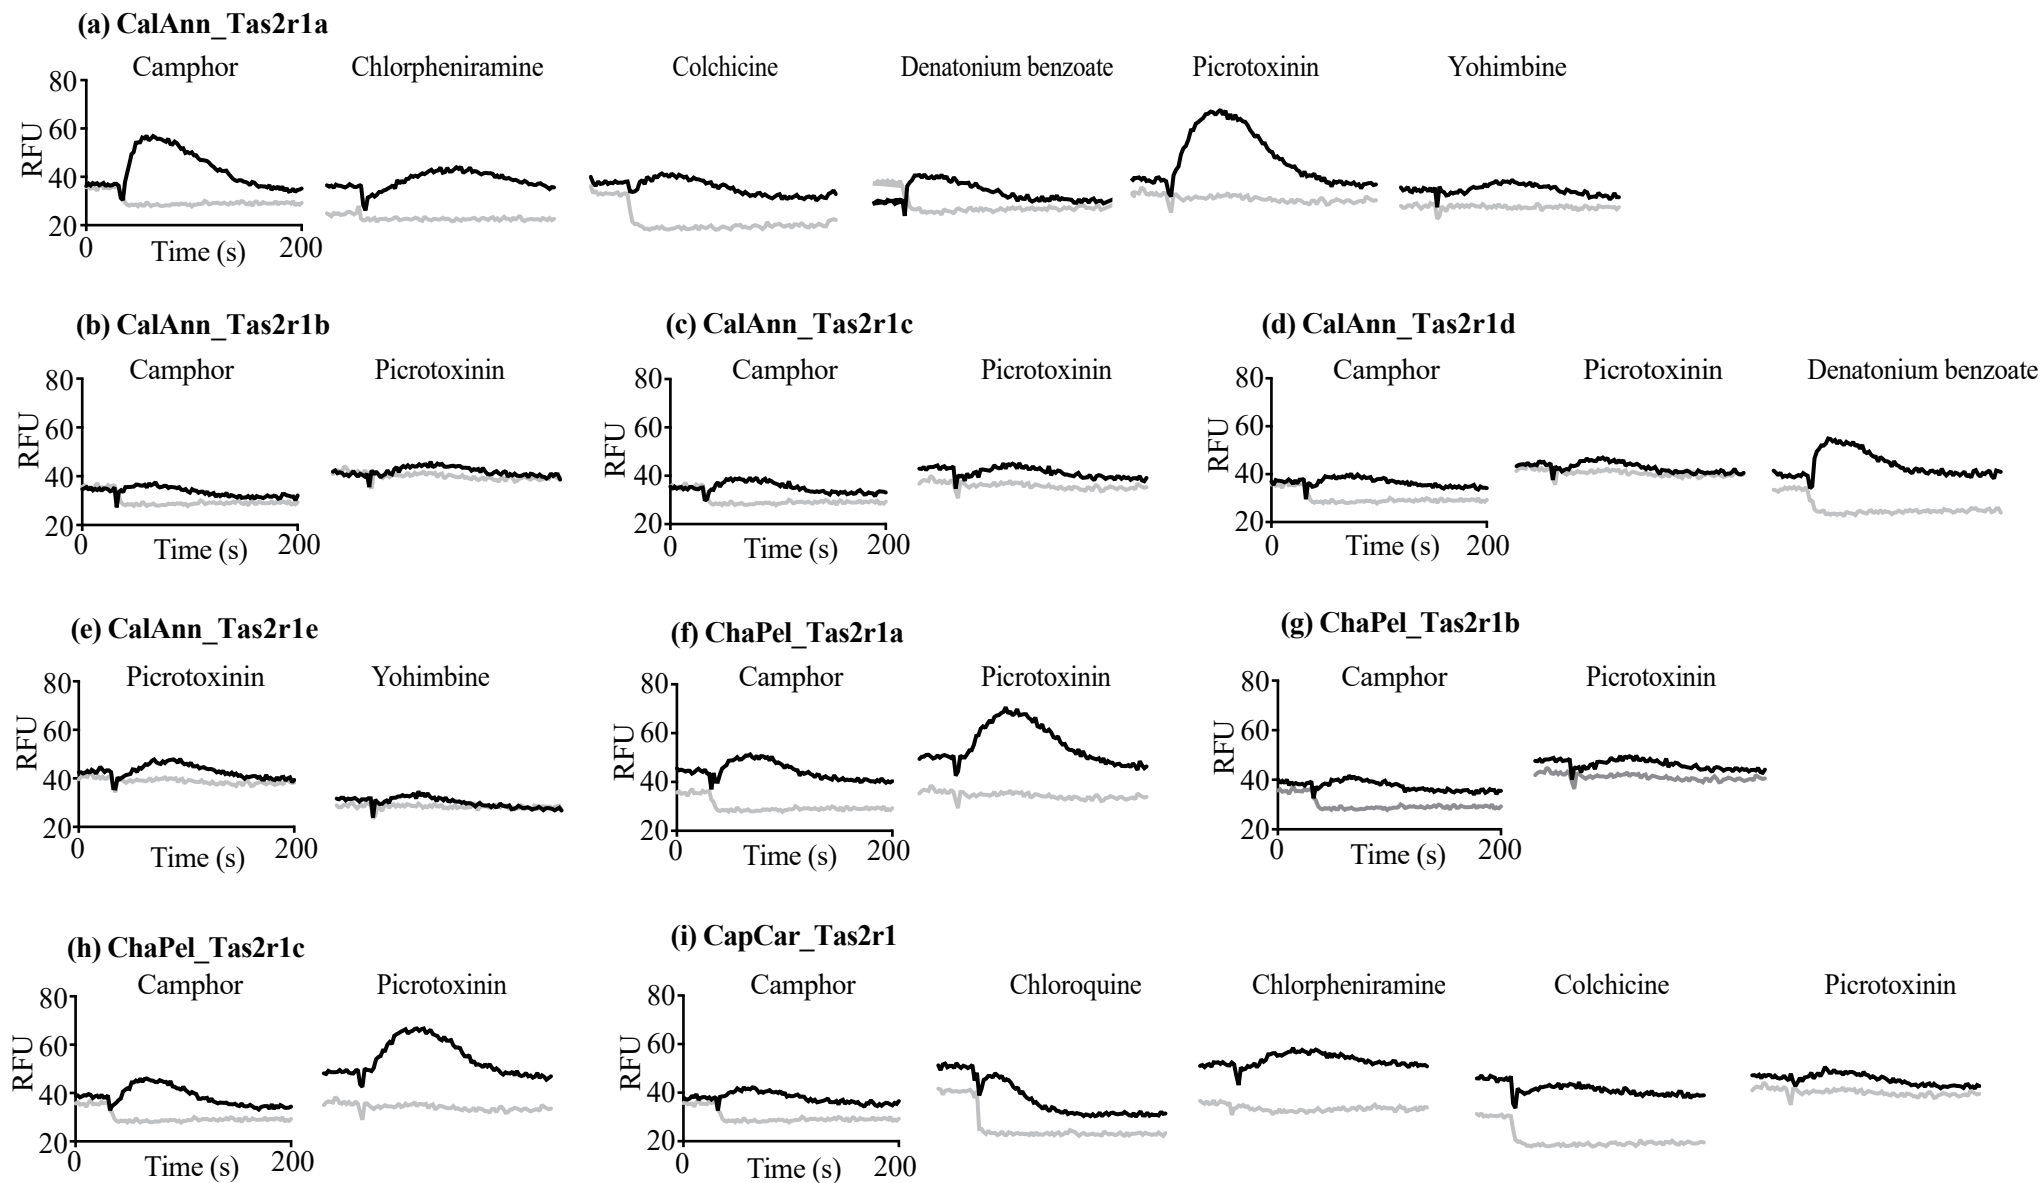

**Figure S2**



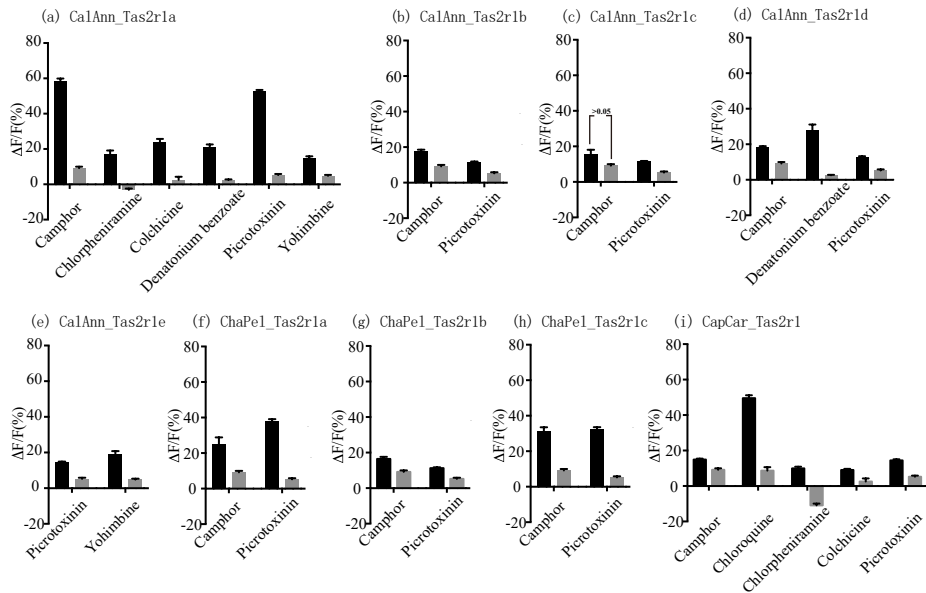

**Figure S3**

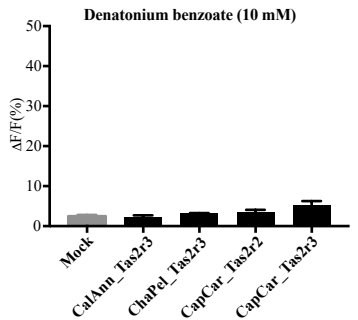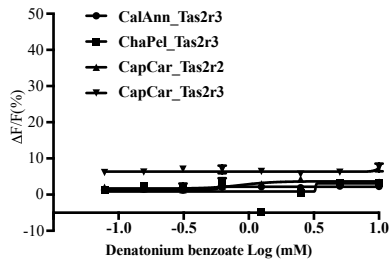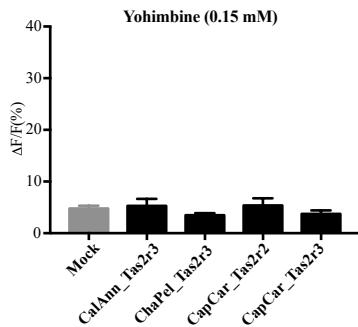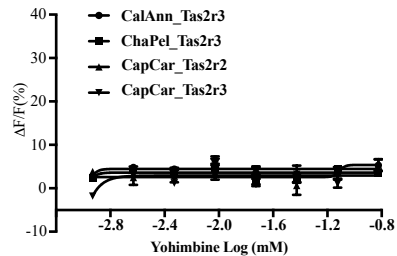

**Figure S4**
